# Supplementary material for: Using Morphological, Molecular and Climatic Data to Delimitate Yews along the Hindu Kush-Himalaya and Adjacent Regions
Source: PubMed Central journal article supplement (PMC3466193; doi:10.1371/journal.pone.0046873), 2012-10-08

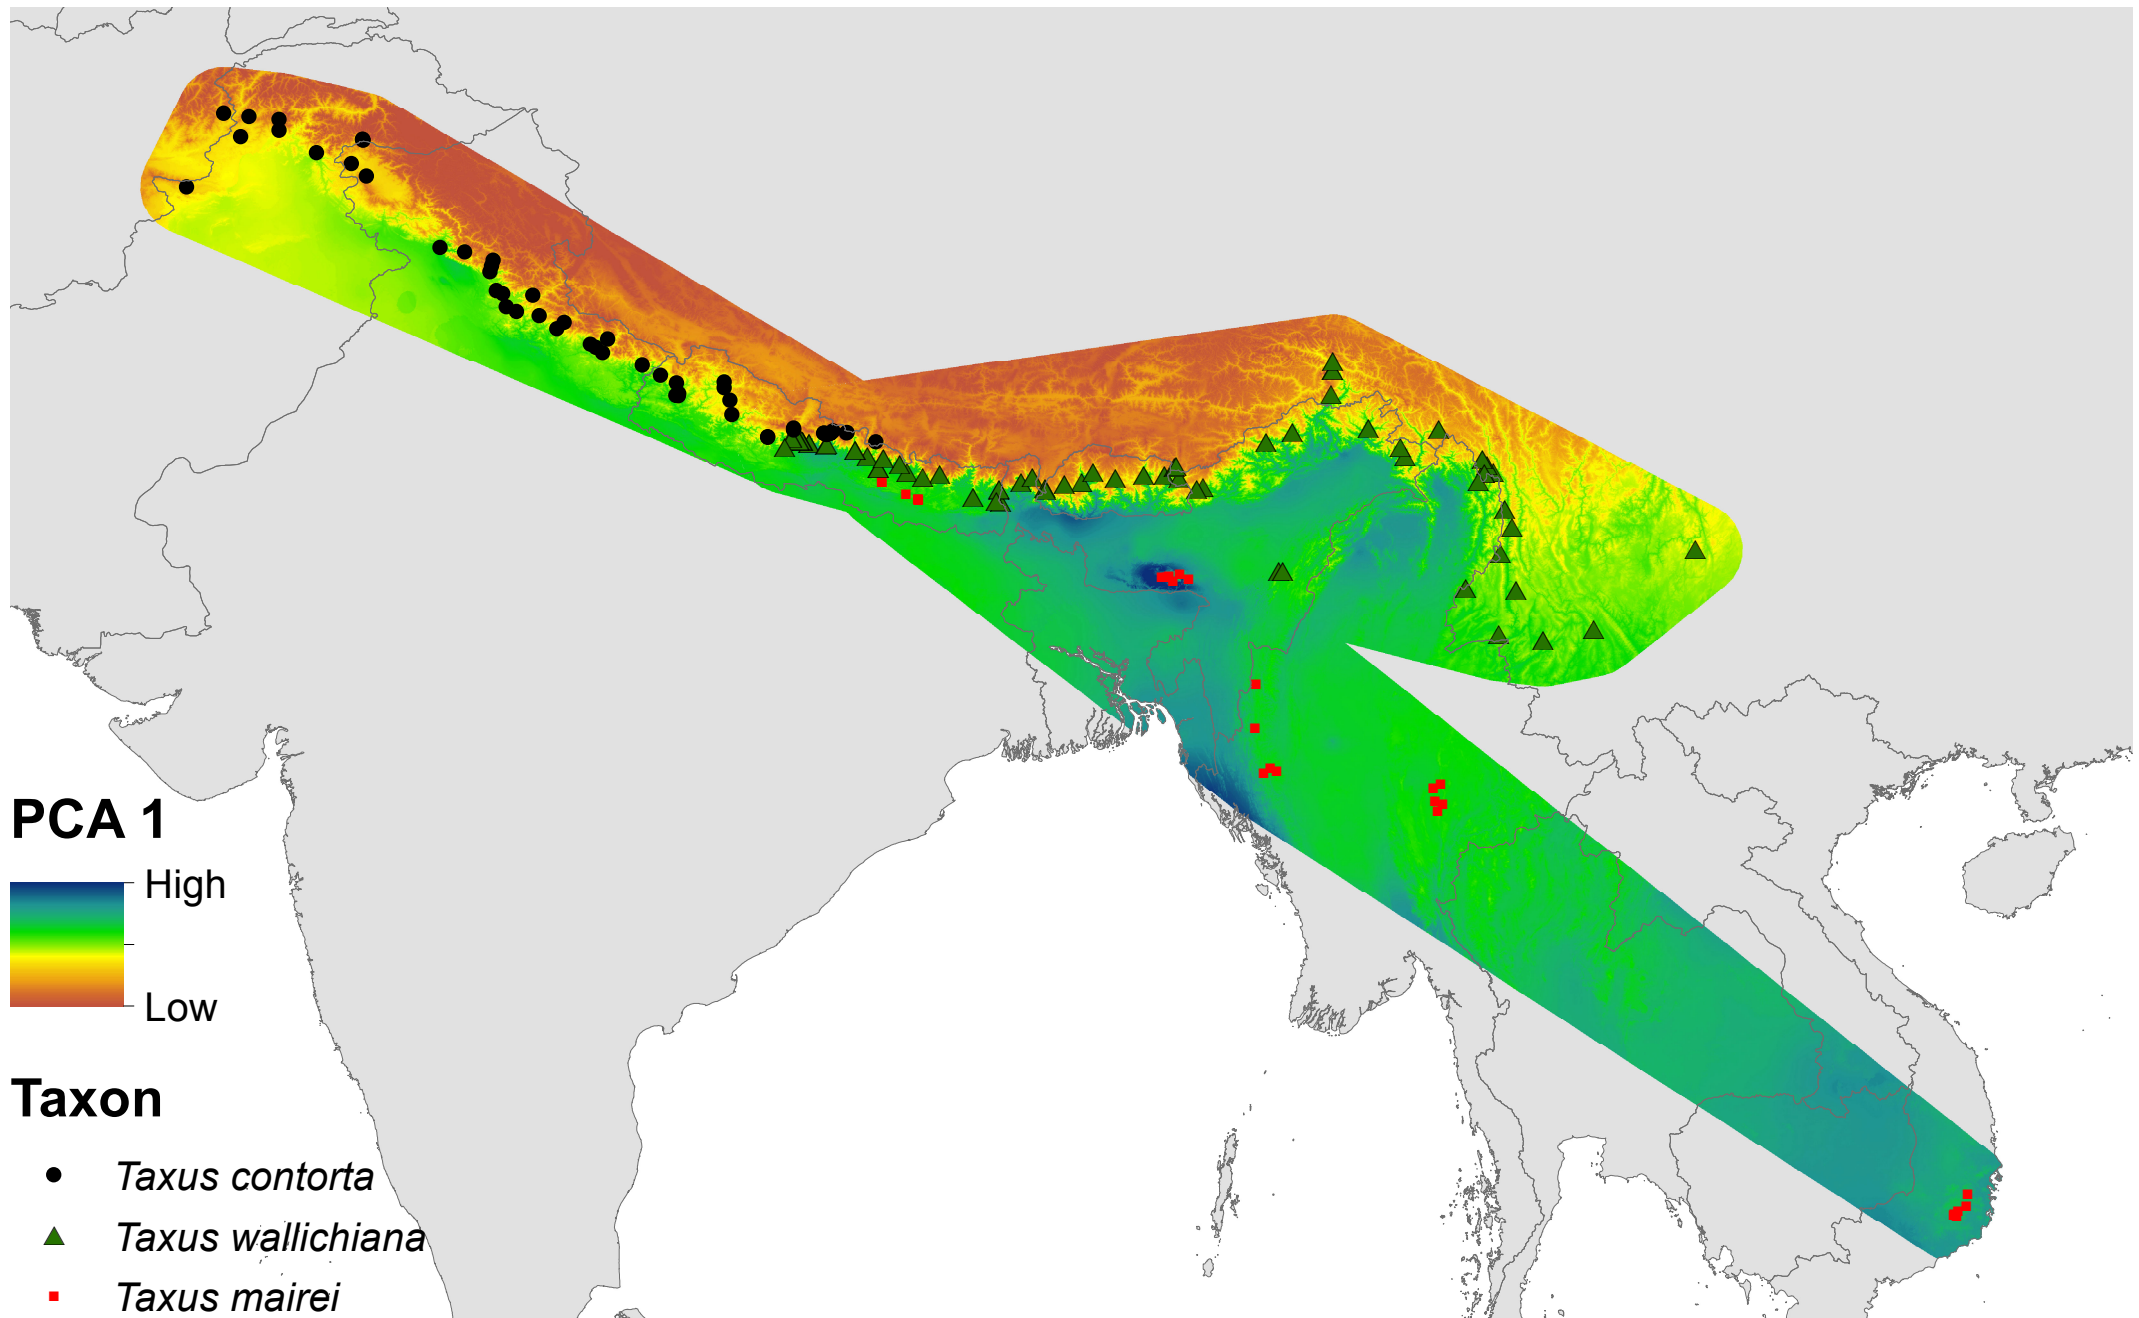

Supplement: pone.0046873.s004.pdf [file pone.0046873.s004.pdf]
