# Supplementary material for: Using Morphological, Molecular and Climatic Data to Delimitate Yews along the Hindu Kush-Himalaya and Adjacent Regions
Source: PubMed Central journal article supplement (PMC3466193; doi:10.1371/journal.pone.0046873), 2012-10-08
Supplement: pone.0046873.s008.pdf [file pone.0046873.s008.pdf]

## Supplementary Table S2

**Table S2. Morphological characters used.** Qualitative and quantitative characters used in the morphometric analyses (adopted from Möller et al. 2007). Character 11 shaded grey was modified in the present study.

| Character number | State                        | Type       | Coding                                         | State                                                                                                              |
|------------------|------------------------------|------------|------------------------------------------------|--------------------------------------------------------------------------------------------------------------------|
| Leaf characters  |                              |            |                                                |                                                                                                                    |
| 1                | Angle                        | Discrete   | 0<br>1<br>2<br>3<br>4<br>5<br>6<br>7<br>8<br>9 | 90-100°<br>90°<br>80-90°<br>70-90°<br>70-80°<br>60-80°<br>60-70°<br>50-70°<br>40-50°<br>40-70°                     |
| 2                | Density                      | Continuous | Number of leaves on 2-cm branch section        |                                                                                                                    |
| 3                | Shortest length              | Continuous | mm                                             |                                                                                                                    |
| 4                | Longest length               | Continuous | mm                                             |                                                                                                                    |
| 5                | Narrowest width              | Continuous | mm                                             |                                                                                                                    |
| 6                | Widest width                 | Continuous | mm                                             |                                                                                                                    |
| 7                | Length/width ratio           | Continuous | Average lengths/widths                         |                                                                                                                    |
| 8                | Curvature                    | Discrete   | 0<br>1<br>2<br>3                               | Straight<br>Some falcate, some straight<br>Falcate<br>Sigmoid                                                      |
| 9                | Margin taper                 | Discrete   | 0<br>1<br>2<br>3                               | Parallel<br>Some parallel, some not<br>Parallel to 2/3-3/4 from base<br>Lanceolate (from base or near 1/2 tapered) |
| 10               | Base symmetry                | Discrete   | 0<br>1                                         | Yes<br>No                                                                                                          |
| 11               | Leaf arrangement             | Discrete   | 0<br>1<br>2                                    | Spiral<br>Pectinate<br>Irregularly pectinate                                                                       |
| 12               | Apex symmetry                | Discrete   | 0<br>1                                         | Yes<br>No                                                                                                          |
| 13               | Apex shape                   | Discrete   | 0<br>1<br>2<br>3                               | 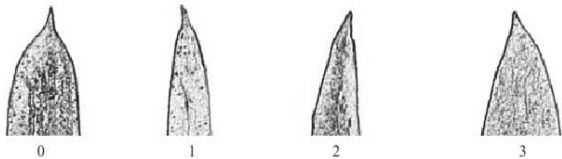                               |
| 14               | Mucro                        | Discrete   | 0<br>1                                         | Indistinct<br>Distinct                                                                                             |
| 15               | Texture                      | Discrete   | 0<br>1<br>2                                    | Thin<br>Medium<br>Thick                                                                                            |
| 16               | Edges                        | Discrete   | 0<br>1<br>2                                    | Flat<br>Revolute<br>Incurving to revolute                                                                          |
| 17               | Mid rib appearance (abaxial) | Discrete   | 0<br>1<br>2                                    | Elevated<br>Level<br>Sunken                                                                                        |
| 18               | Mid rib appearance (adaxial) | Discrete   | 0<br>1<br>2                                    | Elevated<br>Level<br>Sunken                                                                                        |
| 19               | Papillation on mid rib       | Discrete   | 0                                              | Absent                                                                                                             |

| Character number | State                                     | Type       | Coding              | State                                   |
|------------------|-------------------------------------------|------------|---------------------|-----------------------------------------|
|                  |                                           |            | 1                   | Scattered                               |
|                  |                                           |            | 2                   | Dense                                   |
| 20               | Mid rib color                             | Discrete   | 0                   | Same                                    |
|                  |                                           |            | 1                   | Different                               |
| 21               | Mid rib shininess                         | Discrete   | 0                   | No                                      |
|                  |                                           |            | 1                   | Yes                                     |
| 22               | Margin color                              | Discrete   | 0                   | Same                                    |
|                  |                                           |            | 1                   | Different                               |
| 23               | Margin shininess                          | Discrete   | 0                   | No                                      |
|                  |                                           |            | 1                   | Yes                                     |
| 24               | Margin width up to mid rib                | Discrete   | 0                   | Narrower                                |
|                  |                                           |            | 1                   | Equal                                   |
|                  |                                           |            | 2                   | Broader                                 |
| 25               | Number of stomatal bands                  | Continuous | Mean of five counts |                                         |
| 26               | Stomata density in longitudinal direction | Discrete   | 0                   | Not dense (more than diameter of stoma) |
|                  |                                           |            | 1                   | Dense (less than diameter of stoma)     |
|                  |                                           |            | 2                   | Very dense (almost touching)            |
| Bud Character    |                                           |            |                     |                                         |
| 27               | Bud scale persistence                     | Discrete   | 0                   | None                                    |
|                  |                                           |            | 1                   | Some                                    |
|                  |                                           |            | 2                   | Most                                    |
